# Supplementary material for: The Cell Transformation Assay: A Historical Assessment of Current Knowledge of Applications in an Integrated Approach to Testing and Assessment for Non-Genotoxic Carcinogens
Source: MDPI journal article supplement (doi:10.3390/ijms24065659), 2023-03-16
Supplement: s1 [file s1]

Table S2 – Revised genotoxic data for chemicals able to induce cell transformation in the SHE CTA , final list of chemicals

| CAS Registry Number | Chemical name                      | SHE pH 6.7 | SHE pH 7.0 | Ame s | <i>in vitro</i> MLA | <i>in vitro</i> MN | <i>in vitro</i> CA | <i>in vivo</i> MN | <i>in vivo</i> CA | <i>in vivo</i> UDS | <i>in vivo</i> transgenic | <i>in vivo</i> DNA damage | IARC <sup>1</sup> | CLP (CMR ) | NTP (RoC) <sup>2</sup>                          | Overall carc. Classification | Use                                      |
|---------------------|------------------------------------|------------|------------|-------|---------------------|--------------------|--------------------|-------------------|-------------------|--------------------|---------------------------|---------------------------|-------------------|------------|-------------------------------------------------|------------------------------|------------------------------------------|
| 88133-11-3          | Bemitradine                        | +          | NA         | -     | -                   | NA                 | -                  | -                 | NA                | NA                 | NA                        | NA                        | NA                |            | + (NL)                                          | Y/Y                          | Diuretic antihypertensive drug           |
| 94-36-0             | Benzoyl peroxide                   | NA         | +          | -     | NA                  | NA                 | -                  | NA                | NA                | NA                 | NA                        | NA                        | 3                 |            | -                                               | Y/Y                          | Drug product                             |
| 85-68-7             | Butylbenzylphthalate               | +          | NA         | -     | -                   | NA                 | -                  | -                 | +                 | NA                 | NA                        | NA                        | 3                 | R2 / R1B   | I/ (NL)                                         | Y/Y                          | Plasticizer                              |
| 637-07-0            | Clofibrate                         | +          | +          | -     | -                   | -                  | E                  | -                 | -                 | -                  | I                         | -                         | 3                 |            | -                                               | Y/Y                          | Antilipidemic aNA anticholesteremic drug |
| 117-81-7            | di (2-Ethylhexyl) phthalate (DEHP) | +          | +          | -     | -                   | -                  | -                  | -                 | -                 | -                  | E                         | -                         | 2B                | R1B        | NA                                              | Y/Y                          | Plasticizer                              |
| 111-42-2            | Diethanolamine                     | +          | NA         | -     | I                   | NA                 | -                  | -                 | NA                | NA                 | NA                        | -                         | 2B                |            | Reasonably anticipated to be carcinogenic (RoC) | Y/Y                          | Emulsifier                               |
| 105-55-5            | <i>N,N'</i> -Diethylthiourea       | +          | NA         | -     | +                   | NA                 | -                  | NA                | NA                | NA                 | NA                        | NA                        | 3                 |            | + in mouse both sexes, but not in rats (NL)     | Y/Y                          | Rubber chemical                          |
| 100-41-4            | Ethyl benzene                      | +          | NA         | -     | +                   | +                  | -                  | -                 | NA                | -                  | NA                        | NA                        | 2B                |            | + in rats both sexes, but not in mouse (NL)     | Y/Y                          | Intermediate                             |
| 93-15-2             | Methyl eugenol                     | +          | NA         | -     | -                   | -                  | -                  | -                 | NA                | NA                 | +                         | +                         | 2B                | M2*, C2*   | LE (NL)                                         | Y/Y                          | Flavoring agent                          |
| 21340-68-1          | Methyclofenapate                   | NA         | +          | -     | NA                  | NA                 | NA                 | NA                | NA                | -                  | NA                        | NA                        | NA                |            | -                                               | Y/Y                          | Antilipidemic drug                       |
| 434-07-1            | Oxymetholone                       | +          | NA         | -     | -                   | +                  | -                  | -                 | -                 | NA                 | NA                        | NA                        | NA                | C2*, R2*   | Reasonably anticipated to be carcinogenic (RoC) | Y/Y                          | Anabolic steroid                         |

|            |                                             |   |    |   |    |    |   |    |    |    |    |    |    |       |                                                 |      |                           |
|------------|---------------------------------------------|---|----|---|----|----|---|----|----|----|----|----|----|-------|-------------------------------------------------|------|---------------------------|
| 50-55-5    | Reserpine                                   | + | NA | - | I  | -  | - | +  | +  | -  | NA | NA | 3  |       | NA                                              | Y/Y  | Antihypertensive drug     |
| 50892-23-4 | Wyeth-14,643                                | + | NA | - | NA | +  | + | -  | NA | -  | +  | +  | NA | C1B * | Reasonably anticipated to be carcinogenic (RoC) | Y/Y  | Drug product              |
| 16561-29-8 | 12-O-Tetradecanoyl phorbol 13-acetate (TPA) | + | +  | - | -  | -  | - | NA | NA | NA | NA | NA | NA |       | Reasonably anticipated to be carcinogenic (RoC) | NA/Y | Phorbol ester             |
| 72-43-5    | Methoxychlor                                | + | NA | - | +  | NA | - | NA | NA | NA | NA | NA | 3  |       | Positive (NL)                                   | N/Y  | Pesticide                 |
| 105-60-2   | Caprolactam                                 | - | +  | - | -  | -  | - | -  | -  | -  | NA | -  | 3  |       | Negative                                        | N/N  | Used in nylon manufacture |

+: positive; -: negative; NA: not available; E: equivocal; I: inconclusive (inadequate evidence); \*: non-harmonised classification; LE = Limited Evidence;

<sup>1</sup> Reviewed according to 2019 update to the IARC Monographs Preamble [128]

<sup>2</sup> Updated according to 15<sup>th</sup> Report on Carcinogens [129]
