# Supplementary material for: The Cell Transformation Assay: A Historical Assessment of Current Knowledge of Applications in an Integrated Approach to Testing and Assessment for Non-Genotoxic Carcinogens
Source: MDPI journal article supplement (doi:10.3390/ijms24065659), 2023-03-16
Supplement: s1 [file s1]

Table S1 – Revised genotoxic data for chemicals able to induce cell transformation in the SHE CTA – Master Table

| CAS Registry Number | Chemical name                                                               | SHE pH 6.7 <sup>(1)</sup> | SHE pH 7.0 <sup>(1)</sup> | Ames | <i>in vitro</i> MLA | <i>in vitro</i> MN | <i>in vitro</i> CA | <i>in vivo</i> MN | <i>in vivo</i> CA | <i>in vivo</i> UDS | <i>in vivo</i> transgenic | <i>in vivo</i> DNA damage | IARC <sup>(2)</sup> | CLP     | Overall carc. Classification |
|---------------------|-----------------------------------------------------------------------------|---------------------------|---------------------------|------|---------------------|--------------------|--------------------|-------------------|-------------------|--------------------|---------------------------|---------------------------|---------------------|---------|------------------------------|
| 134-32-7            | 1-Naphthylamine                                                             | -                         | NA                        | +    | +                   | NA                 | +                  | E                 | NA                | NA                 | NA                        | NA                        | 3                   |         | N                            |
| 108-03-2            | 1-Nitropropane                                                              | NA                        | -                         | -    | +                   | +                  | NA                 | I                 | -                 | NA                 | NA                        | NA                        | NA                  |         | N                            |
| 1948-33-0           | 2- <i>tert</i> -Butyl-1,4-hydroquinone                                      | -                         | NA                        | -    | NA                  | NA / +             | +                  | -                 | -                 | NA                 | NA                        | NA / +                    | NA                  |         | N                            |
| 93-76-5             | 2,4,5-Trichlorophenoxyacetic acid                                           | NA                        | -                         | -    | NA                  | NA                 | +                  | -                 | +                 | NA                 | NA                        | NA                        | NA                  |         | N                            |
| 88-06-2             | 2,4,6-Trichlorophenol                                                       | NA                        | -                         | -    | +                   | NA                 | -                  | NA                | NA                | NA                 | NA                        | NA                        | 2B                  | C2      | Y                            |
| 95-80-7             | 2,4-Diaminotoluene                                                          | +                         | +                         | +    | +                   | NA                 | +                  | -                 | NA                | NA / +             | NA / +                    | NA / +                    | 2B                  | C1B, R2 | Y                            |
| 120-83-2            | 2,4-Dichlorophenol                                                          | NA                        | -                         | +    | I                   | NA                 | E                  | NA                | +                 | NA                 | NA                        | +                         | NA                  |         | N                            |
| 94-75-7             | 2,4-Dichlorophenoxyacetic acid                                              | NA                        | -                         | -    | +                   | NA                 | + / E              | -                 | +                 | -                  | NA                        | NA                        | 2B                  |         | N                            |
| 54150-69-5          | 2,4-Dimethoxyaniline HCl                                                    | -                         | NA                        | +    | + / I               | NA                 | +                  | -                 | NA                | NA                 | NA                        | NA / +                    | NA                  |         | N                            |
| 121-14-2            | 2,4-Dinitrotoluene                                                          | +                         | -A                        | +    | E                   | NA                 | -                  | -                 | NA                | +                  | NA                        | + / NA                    | 2B                  | C1B, R2 | Y                            |
| 823-40-5            | 2,6-Diaminotoluene                                                          | -                         | NA                        | +    | NA / I              | +                  | +                  | NA / +            | NA / -            | NA / E             | NA / -                    | NA / -                    | NA                  |         | N                            |
| 606-20-2            | 2,6-Dinitrotoluene                                                          | +                         | NA                        | +    | NA                  | NA                 | NA                 | NA                | NA                | +                  | NA                        | + / NA                    | 2B                  | C1B, R2 | Y                            |
| 53-96-3             | 2-Acetylaminofluorene [2-Acetaminofluorene] [2-Fluorenyl acetamide (2-FAA)] | E                         | NA                        | +    | +                   | +                  | +                  | + / NA            | + / NA            | + / NA             | + / NA                    | + / NA                    | NA                  | C1B*    | Y                            |
| 91-59-8             | 2-Naphthylamine                                                             | +                         | NA                        | +    | I                   | NA                 | +                  | E                 | NA                | +                  | NA                        | +                         | 1                   | C1A     | Y                            |
| 79-46-9             | 2-Nitropropane                                                              | NA                        | -                         | +    | +                   | +                  | E                  | + / NA            | + / NA            | +                  | NA                        | + / NA                    | 2B                  | C1B     | Y                            |
| 56-49-5             | 3-Methylcholanthrene (MCA)                                                  | +                         | +                         | +    | +                   | +                  | + / E              | E                 | NA                | E                  | +                         | NA                        | NA                  | C1B*    | Y                            |
| 504-88-1            | 3-Nitropropionic acid                                                       | -                         | NA                        | +    | +                   | -                  | E                  | NA                | NA                | NA                 | NA                        | NA                        | NA                  |         | N                            |
| 28322-02-3          | 4-Acetylaminofluorene                                                       | -                         | NA                        | +    | E                   | -                  | -                  | NA                | -                 | E                  | +                         | NA                        | NA                  |         | N                            |
| 99-56-9             | 4-Nitro- <i>o</i> -phenylenediamine 4-Nitro-1,2-benzenediamine              | -                         | NA                        | +    | + / E               | NA / -             | E / +              | E / -             | - / NA            | NA                 | NA                        | NA                        | 3                   |         | N                            |

|            |                                                       |      |    |   |        |        |        |        |        |        |        |        |    |          |      |
|------------|-------------------------------------------------------|------|----|---|--------|--------|--------|--------|--------|--------|--------|--------|----|----------|------|
| 99-55-8    | 5-Nitro- <i>o</i> -toluidine [2-Amino-4-nitrotoluene] | NA   | NT | + | NA     | NA     | +      | NA     | NA     | NA     | NA     | NA     | 3  | C2       | Y    |
| 148-24-3   | 8-Hydroxyquinoline                                    | NA   | -  | + | I      | NA     | +      | -      | NA     | - / NA | NA     | NA     | 3  | R1B      | N    |
| 16561-29-8 | 12-O-Tetradecanoyl phobol 13-acetate (TPA)            | +    | +  | - | -      | -      | -      | NA     | NA     | NA     | NA     | NA     | NA |          | NA/Y |
| 3567-69-9  | Acid red 14 (IC)                                      | -, + | NA | + | I      | NA     | -      | -      | - / NA | NA     | NA     | NA     | 3  |          | N    |
| 79-06-1    | Acrylamide                                            | +    | NA | - | +      | NA / + | +      | +      | +      | E      | +      | +      | 2A | C1B, R2  | Y    |
| 107-13-1   | Acrylonitrile                                         | +    | +  | + | +      | - / NA | +      | E      | -      | -      | -      | +      | 2B | C1B      | Y    |
| 61-82-5    | Amitrole [3-Aminotriazole]                            | NA   | I  | - | - / I  | NA     | -      | -      | -      | - / NA | NA     | NA     | 3  | R2       | Y    |
| 7177-48-2  | Ampicillin                                            | -, + | NA | - | - / I  | NA     | -      | -      | NA / + | NA     | NA     | NA / - | NA |          | N    |
| 101-05-3   | Anilazine                                             | -    | NA | - | +      | NA / + | -      | - / NA | NA     | NA     | + / NA | + / NA | NA |          | N    |
| 120-12-7   | Anthracene                                            | -    | -  | E | +      | NA     | -      | I      | NA     | NA     | NA     | NA     | 3  |          | N    |
| 84-65-1    | Anthraquinone                                         | -    | NA | + | - / NA | + / NA | + / NA | +      | NA     | NA     | NA     | + / NA | 2B | C1B      | Y/N  |
| 313-67-7   | Aristolochic acid                                     | +    | NA | + | + / NA | + / NA | + / NA | + / E  | NA     | - / NA | +      | +      | 1  |          | Y    |
| 88133-11-3 | Bemitradine                                           | +    | NA | - | -      | NA     | -      | -      | NA     | NA     | NA     | NA     | NA |          | Y    |
| 17804-35-2 | Benomyl                                               | +, - | NA | - | +      | +      | NA     | +      | +      | NA     | NA     | NA     | NA | R1B      | Y    |
| 50-32-8    | Benzo( <i>a</i> )pyrene                               | +    | +  | + | +      | +      | +      | +      | +      | E      | +      | E      | 1  | C1B, R1B | Y    |
| 119-53-9   | Benzoin                                               | NA   | -  | - | + / E  | -      | -      | -      | -      | NA / - | NA     | NA / - | NA |          | N    |
| 94-36-0    | Benzoyl peroxide                                      | NA   | +  | - | NA     | NA     | -      | NA     | NA     | NA     | NA     | NA     | 3  |          | Y    |
| 80-05-7    | Bisphenol A                                           | -    | NA | - | NE / I | + / -  | E / +  | -      | +      | NA     | NA     | NA     | NA | R1B      | N    |
| 85-68-7    | Butylbenzylphthalate                                  | +    | NA | - | -      | NA     | -      | -      | +      | NA     | NA     | NA     | 3  | R1B      | Y    |
| 105-60-2   | Caprolactam                                           | -    | +  | - | -      | -      | -      | -      | -      | -      | NA     | NA / - | 3  |          | N    |
| 120-80-9   | Catechol                                              | NA   | +  | - | +      | +      | +      | +      | NA     | NA     | NA     | NA     | 2B | C1B      | Y    |
| 302-17-0   | Chloral hydrate                                       | +    | NA | + | +      | +      | +      | + / E  | - / NA | NA     | NA     | E / NA | 2A |          | Y    |
| 57-74-9    | Chlordane Analytical grade                            | NA   | -  | - | +      | +      | -      | +      | +      | NA     | NA     | + / -  | 2B | C2       | Y    |
| 87-29-6    | Cinnamyl anthranilate                                 | -    | NA | - | +      | NA     | -      | -      | NA     | -      | NA     | NA     | 3  |          | Y    |

|            |                                        |        |    |       |        |        |       |        |        |        |        |        |    |            |   |
|------------|----------------------------------------|--------|----|-------|--------|--------|-------|--------|--------|--------|--------|--------|----|------------|---|
| 637-07-0   | Clofibrate                             | +      | +  | -     | NA / - | -      | + / E | NA / - | - / NA | -      | NA / I | -      | 3  |            | Y |
| 477-30-5   | Colcemid (IC)                          | +, +/- | NA | -     | NA     | +      | -     | NA     | NA     | NA     | NA     | NA     | NA |            | N |
| 5989-27-5  | d -Limonene                            | -      | I  | -     | - / I  | NA     | -     | NA     | NA     | NA     | - / I  | NA / - | 3  |            | Y |
| 69-65-8    | d -Mannitol                            | -      | NA | -     | - / I  | NA     | -     | -      | -      | NA     | NA     | NA     | NA |            | N |
| 1163-19-5  | Decabromo diphenyloxide                | -      | NA | -     | - / I  | NA     | -     | +      | NA / I | NA     | NA     | NA     | 3  |            | Y |
| 117-81-7   | di (2-Ethylhexyl) phthalate (DEHP)     | +      | +  | -     | -      | -      | -     | - / NA | -      | -      | - / E  | -      | 2B | R1B        | Y |
| 439-14-5   | Diazepam                               | -, +/- | NA | -     | NA     | +      | -     | +      | I      | NA     | NA     | NA     | 3  |            | N |
| 50-29-3    | Dichlorodiphenyl trichloroethane (DDT) | NA     | -  | -     | -      | +      | I     | -      | +      | -      | NA     | +      | 2A | C2         | Y |
| 111-42-2   | Diethanolamine                         | +      | NA | -     | - / I  | NA     | -     | -      | NA     | NA     | NA     | NA / - | 2B |            | Y |
| 56-53-1    | Diethylstilbestrol (DES)               | E      | E  | -     | + / I  | +      | +     | E      | +      | NA     | NA     | NA / - | 1  | C1B*, R1B* | Y |
| 150-38-9   | EDTA, trisodium salt trihydrate        | -      | NA | -     | - / I  | NA     | -     | NA     | NA     | NA     | NA     | NA / - | NA |            | N |
| 106-89-8   | Epichlorhydrin                         | +      | NA | +     | +      | NA     | +     | -      | E      | +      | NA     | NA     | 2A | C1B        | Y |
| 64-17-5    | Ethyl alcohol [Ethanol]                | -      | NA | -     | -      | NA     | -     | E      | -      | NA     | NA     | +      | 1  |            | Y |
| 100-41-4   | Ethyl benzene                          | +      | NA | -     | +      | +      | -     | -      | NA     | -      | NA     | NA     | 2B |            | Y |
| 60-00-4    | Ethylenediaminetetracetic acid         | -      | NA | -     | +      | NA     | -     | NA     | NA     | NA     | NA     | NA     | NA |            | N |
| 97-53-0    | Eugenol                                | -      | NA | -     | +      | NA / + | +     | E / -  | NA     | NA / - | NA / - | NA     | 3  |            | N |
| 67774-32-7 | Firemaster FF1                         | NA     | NA | NA    | -      | NA     | NA    | -      | -      | -      | NA     | -      | NA |            | Y |
| 50-00-0    | Formaldehyde                           | +      | NA | +     | +      | + / NA | +     | E      | -      | NA     | NA     | NA     | 1  | C1B        | Y |
| 98-00-0    | Furfuryl alcohol                       | -      | NA | -     | NA     | NA     | E     | -      | - / E  | NA     | NA     | NA     | 2B | C2         | Y |
| 446-72-0   | Genistein                              | -      | NA | -     | +      | +      | +     | -      | -      | NA     | NA     | NA     | NA |            | Y |
| 126-07-8   | Griseofulvin                           | -, +   | NA | -     | +      | +      | +     | -      | +      | NA     | NA     | NA     | 2B | C2*, R1B*  | Y |
| 33229-34-4 | HC Blue 2                              | -      | NA | +     | I / +  | +      | -     | -      | - / NA | -      | NA     | NA     | 3  |            | N |
| 680-31-9   | Hexamethyl phosphoramidate             | NA     | +  | E / + | E      | +      | E     | +      | +      | NA     | NA     | NA     | 2B | C1B        | Y |

|            |                                                                                  |      |    |       |        |        |        |       |        |        |        |        |    |          |     |
|------------|----------------------------------------------------------------------------------|------|----|-------|--------|--------|--------|-------|--------|--------|--------|--------|----|----------|-----|
| 123-31-9   | Hydroquinone                                                                     | NA   | +  | -     | +      | +      | +      | +     | +      | NA     | NA     | NA     | 3  | C2       | Y   |
| 78-84-2    | Isobutyraldehyde                                                                 | -    | NA | -     | +      | NA / - | +      | -     | +      | NA     | NA     | NA / - | NA |          | N   |
| 50-81-7    | l-Ascorbic acid                                                                  | -    | NA | E / + | E      | +      | -      | +     | +      | NA     | NA     | -      | NA |          | N   |
| 5874-97-5  | Metaproterenol hemisulfate                                                       | -    | NA | -     | -      | NA     | -      | -     | NA     | NA     | NA     | NA     | NA |          | Y   |
| 135-23-9   | Methapyrilene HCl                                                                | +    | NA | +     | I      | NA     | +      | NA    | NA     | NA     | NA     | NA     | NA |          | Y   |
| 72-43-5    | Methoxychlor                                                                     | +    | NA | -     | +      | NA     | -      | NA    | NA     | NA     | NA     | NA     | 3  |          | N/Y |
| 93-15-2    | Methyl eugenol                                                                   | +    | NA | -     | NA / - | NA / - | I / -  | -     | NA     | NA     | NA / + | NA / + | 2B | C2*      | Y   |
| 598-55-0   | Methylcarbamate (Methyl urethane)                                                | -    | NA | -     | - / I  | NA     | -      | -     | NA     | NA     | NA     | NA / - | 3  | C2*      | Y   |
| 21340-68-1 | Methylclofenapate                                                                | NA   | +  | -     | NA     | NA     | NA     | NA    | NA     | -      | NA     | NA     | NA |          | Y   |
| 105-55-5   | N,N'-Diethylthiourea                                                             | +    | NA | -     | +      | NA     | -      | NA    | NA     | NA     | NA     | NA     | 3  |          | Y   |
| 70-25-7    | N-Nitroso-N-methylnitroguanidine [N- Methyl-N'-nitro-N-nitrosoguanidinen (MNNG)] | +    | NA | +     | +      | +      | +      | +     | +      | +      | +      | +      | 2A | C1B      | Y   |
| 141-32-2   | n-Butyl acrylate                                                                 | NA   | -  | -     | +      | -      | +      | NA    | +      | NA     | NA     | NA     | 3  |          | N   |
| 139-13-9   | Nitrilotriacetic Acid                                                            | -, + | NA | -     | - / E  | +      | - / E  | -     | NA     | NA     | NA     | +      | 2B | C2*      | Y   |
| 90-04-0    | o -Anisidine                                                                     | +    | I  | - / + | +      | NA     | +      | -     | NA     | -      | +      | +      | 2A | C1B      | Y   |
| 134-29-2   | o -Anisidine HCl                                                                 | NA   | NA | +     | NA / + | NA     | NA / + | -     | NA     | NA / - | NA / + | NA / + | 2A | C2*      | Y   |
| 95-53-4    | o- Toluidine                                                                     | +    | +  | +     | + / I  | + / NA | + / E  | - / + | + / -  | NA     | NA     | +      | 1  | C1B      | Y   |
| 636-21-5   | o -Toluidine HCl                                                                 | NA   | NA | E / + | NA / I | I / NA | I / E  | I / + | I / -  | NA     | NA     | NA / + | 1  | C1B*     | Y   |
| 434-07-1   | Oxymetholone                                                                     | +    | NA | -     | -      | NA / + | -      | -     | - / NA | NA     | NA     | NA     | NA | C2*, R2* | Y   |
| 6493-05-6  | Pentoxifylline                                                                   | -    | NA | -     | +      | +      | +      | NA    | NA     | NA     | NA     | NA     | NA |          | N   |
| 62-44-2    | Phenacetin                                                                       | -    | NA | +     | I      | -      | +      | +     | - / NA | NA     | NA     | +      | 1  | C1B*     | Y   |

|            |                                                        |    |    |       |        |        |        |        |        |        |        |        |    |         |   |
|------------|--------------------------------------------------------|----|----|-------|--------|--------|--------|--------|--------|--------|--------|--------|----|---------|---|
| 50-06-6    | Phenobarbital                                          | +  | +  | +     | I      | -      | +      | E      | -      | -      | E      | NA     | 2B | C2*     | Y |
| 57-30-7    | Phenobarbital sodium                                   | NA | NA | -     | NA     | NA     | NA     | -      | NA     | NA     | -      | +      | NA | C2*     | Y |
| 108-95-2   | Phenol                                                 | NA | -  | -     | E / +  | +      | + / NA | E / +  | + / -  | NA     | NA     | +      | 3  |         | N |
| 77-09-8    | Phenolphthalein                                        | +  | NA | -     | NA     | -      | +      | +      | NA     | NA     | NA     | -      | 2B | C1B, R2 | Y |
| 85-44-9    | Phthalic anhydride                                     | E  | -  | -     | + / I  | NA     | -      | NA / I | NA     | NA     | NA     | NA     | NA |         | N |
| 624-18-0   | p-Phenylenediamine 2HCl 4-Aminoaniline dihydrochloride | -  | NA | +     | +      | +      | +      | -      | NA     | NA / - | NA     | -      | NA |         | N |
| 125-33-7   | Primidone                                              | -  | NA | +     | - / NA | + / NA | -      | -      | NA     | NA     | NA     | NA     | 2B | C2*     | Y |
| 75-56-9    | Propylene oxide                                        | +  | NA | +     | +      | + / NA | +      | + / E  | +      | NA     | NA     | NA     | 2B | C1B     | Y |
| 110-86-1   | Pyridine                                               | -  | NA | -     | - / I  | NA     | -      | -      | - / NA | -      | NA     | - / NA | 2B |         | Y |
| 50-55-5    | Reserpine                                              | +  | NA | -     | - / I  | NA / - | -      | - / +  | +      | -      | NA     | NA     | 3  |         | Y |
| 108-46-3   | Resorcinol                                             | -  | -  | -     | +      | NA / + | +      | + / -  | NA     | NA     | NA     | NA     | 3  |         | N |
| 83-79-4    | Rotenone                                               | +  | NA | -     | +      | +      | +      | + / -  | NA     | NA     | NA     | NA     | NA |         | N |
| 1300-72-7  | Sodium xylenesulfonate                                 | -  | NA | -     | E      | NA     | -      | NA     | NA     | NA     | NA     | NA     | NA |         | N |
| 127-69-5   | Sulfisoxazole                                          | -  | NA | -     | + / I  | NA / - | -      | -      | NA     | NA     | NA     | NA     | 3  |         | N |
| 97-77-8    | Tetraethylthiuramdisulfide<br>Disulfiram               | +  | NA | -     | +      | NA     | +      | - / I  | - / NA | NA     | NA     | NA     | 3  |         | N |
| 109-99-9   | Tetrahydrofuran                                        | -  | NA | -     | NA / I | NA / - | -      | E      | -      | -      | NA     | NA     | 2B | C2      | Y |
| 148-79-8   | ThiabeNAazole                                          | -  | NA | +     | +      | E      | +      | +      | NA     | NA     | NA     | +      | NA |         | N |
| 76-87-9    | Triphenyltin hydroxide                                 | -  | NA | -     | + / E  | NA / + | -      | NA / I | NA     | NA     | NA     | NA     | NA | C2, R2  | N |
| 78-42-2    | Tris(2-ethylhexyl)phosphate (TEHP)                     | -  | NA | -     | - / I  | NA     | -      | -      | -      | NA     | NA     | NA     | NA |         | Y |
| 51-79-6    | Urethane [Ethyl carbamate]                             | +  | NA | E / + | -      | -      | E      | +      | +      | + / NA | +      | E / NA | 2A | C1B     | Y |
| 50892-23-4 | Wyeth-14,643                                           | +  | NA | -     | NA     | +      | NA / + | -      | NA     | NA / - | NA / + | NA / + | NA | C1B*    | Y |

The genotoxicity data collected in the initial evaluation by the OECD CTA expert group, were updated considering the more recently published and curated EURL ECVAM Genotoxicity and Carcinogenicity Consolidated Database of Ames Negative Chemicals [127] (chemicals highlighted in green). The data from the non-highlighted chemicals

could not be revised since they were not present in the aforementioned database. The red highlights represent the cases in which the original data differed from the ones in the database.

+: positive; -: negative; NA: not available; E: equivocal; I: inconclusive (inadequate evidence); #: dose at pH 7 were very low compared to the study at pH 6.7; Y: carcinogen; N: non-carcinogen; \*: non-harmonised classification

<sup>1</sup> OECD (2007). Detailed Review Paper on Cell transformation assays for detection of chemical carcinogens, OECD Environment, Health and Safety Publications, Series on Testing and Assessment, No. 31. OECD, Paris [37]

<sup>2</sup> Reviewed according to 2019 update to the IARC Monographs Preamble [128]
